# Supplementary material for: Avalanche size estimation and avalanche outline determination by experts: reliability and implications for practice
Source: Copernicus journal article supplement (doi:10.5194/egusphere-2023-586), 2023-05-11
Supplement: Supplementary file 1 [file egusphere-2023-586-supplement.pdf]

Supplement to «**Avalanche size estimation and avalanche outline determination by experts: reliability and implications for practice**»

Elisabeth D. Hafner<sup>1,2,3</sup>, Frank Techel<sup>1</sup>, Rodrigo Caye Daudt<sup>3</sup>, Jan Dirk Wegner<sup>3,4</sup>, Konrad Schindler<sup>3</sup>, and Yves Bühler<sup>1,2</sup>

<sup>1</sup>WSL Institute for Snow and Avalanche Research SLF, Davos Dorf, 7260 Switzerland

<sup>2</sup>Climate Change, Extremes, and Natural Hazards in Alpine Regions Research Center CERC, Davos Dorf, 7260 Switzerland

<sup>3</sup>EcoVision Lab, Photogrammetry and Remote Sensing, ETH Zurich, Zurich, 8093 Switzerland

<sup>4</sup>Institute for Computational Science, University of Zurich, Zurich, 8057 Switzerland

**Structure of the survey sent to the forecasters. Question 1 was asked 10 times for each avalanche part of the survey. The survey was created with ArcGIS Survey123.**

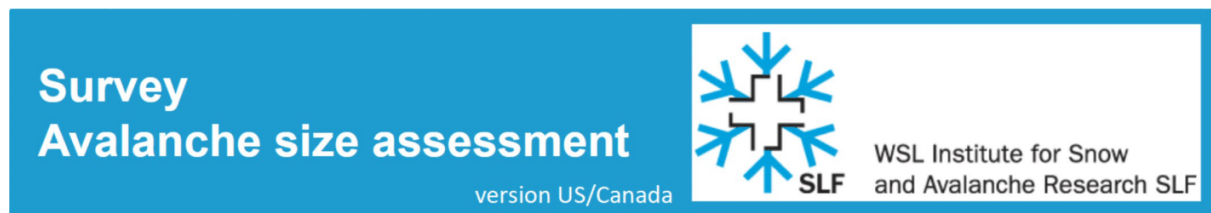

With this survey we would like to find out how consistently "experts" assess avalanche size. We have prepared eleven questions that will take no more than 10 minutes to answer

**Let's go!**

**In what role do you deal with avalanches?\***

|                                                   |                                                              |                                    |
|---------------------------------------------------|--------------------------------------------------------------|------------------------------------|
| <input checked="" type="radio"/> Avalanche warner | <input type="radio"/> Mountain guide, tour leader or similar | <input type="radio"/> Observer SLF |
| <input type="radio"/> Other                       |                                                              |                                    |

**In which of the following countries do you work for the avalanche warning?\***

If you work as an avalanche warner in a country that is part of the EAWS please use [this survey](#) instead.

|                                     |                              |                             |
|-------------------------------------|------------------------------|-----------------------------|
| <input type="radio"/> Unites States | <input type="radio"/> Canada | <input type="radio"/> other |
|-------------------------------------|------------------------------|-----------------------------|

## Question 1

How big would you estimate this avalanche to be?\*

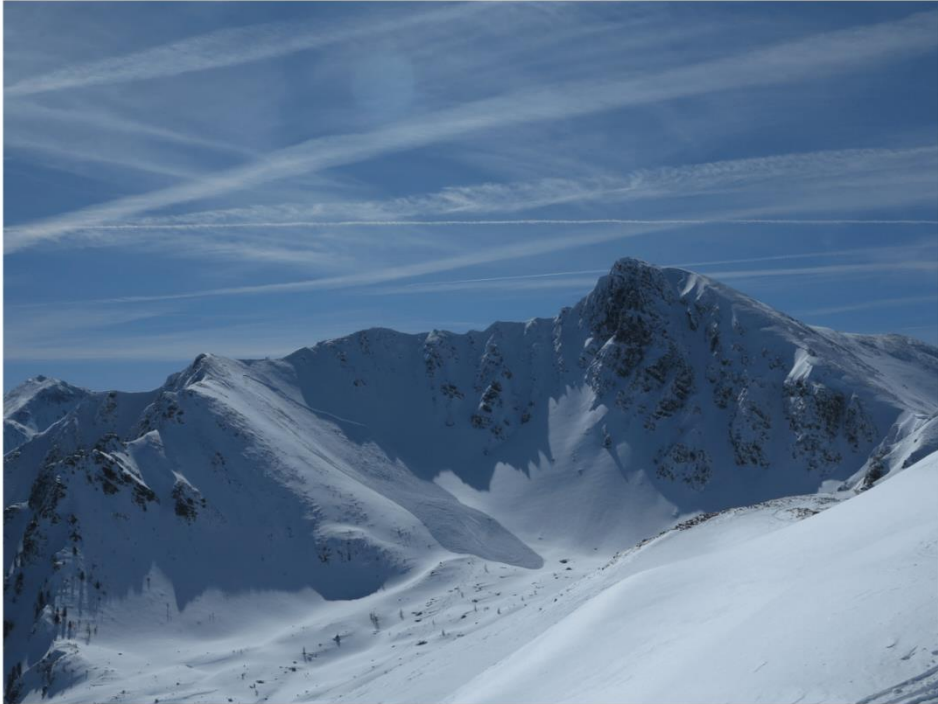

small avalanche  
(size 1)

medium  
avalanche (size 2)

large avalanche  
(size 3)

very large  
avalanche (size 4)

extremely large  
avalanche (size 5)

do not know

Would you have liked to give an intermediate size?\*

Yes

No

Which one?\*

-Please select-

Size 1 to 2

Size 2 to 3

Size 3 to 4

Size 4 to 5

## Question 11

**How important were the following criteria for you to estimate the avalanche size from the photos?**

(criteria in alphabetic order)

|                               | very important        | important             | less important        | not at all important  |
|-------------------------------|-----------------------|-----------------------|-----------------------|-----------------------|
| <b>Avalanche dimensions*</b>  | <input type="radio"/> | <input type="radio"/> | <input type="radio"/> | <input type="radio"/> |
| <b>Destructive potential*</b> | <input type="radio"/> | <input type="radio"/> | <input type="radio"/> | <input type="radio"/> |
| <b>Run out*</b>               | <input type="radio"/> | <input type="radio"/> | <input type="radio"/> | <input type="radio"/> |
| <b>Volume*</b>                | <input type="radio"/> | <input type="radio"/> | <input type="radio"/> | <input type="radio"/> |

[Back](#)

[Submit](#)
